# Supplementary material for: Enhanced robustness of half-metallicity in VBr3 nanowires by strains and transition metal doping
Source: Royal Society of Chemistry journal article supplement (doi:10.1039/d0cp04764c), 2020-01-01
Supplement: d0cp04764c1.pdf [file d0cp04764c1.pdf]

## Electronic Supplementary Information

### **Enhanced robustness of half-metallicity in $VBr_3$ nanowires by strains and transition metal doping**

Xing Yu<sup>1</sup>, Fanqiang Chen<sup>2</sup>, Zhizhou Yu<sup>2\*</sup> and Yafei Li<sup>1\*</sup>

1 Jiangsu Collaborative Innovation Centre of Biomedical Functional Materials, Jiangsu Key Laboratory of New Power Batteries, School of Chemistry and Materials Science, Nanjing Normal University, Nanjing 210023, China

2 Center for Quantum Transport and Thermal Energy Science, School of Physics and Technology, Nanjing Normal University, Nanjing 210023, China

\*Correspondence to: yuzhizhou@njnu.edu.cn (ZY) and liyafei@njnu.edu.cn (YL)

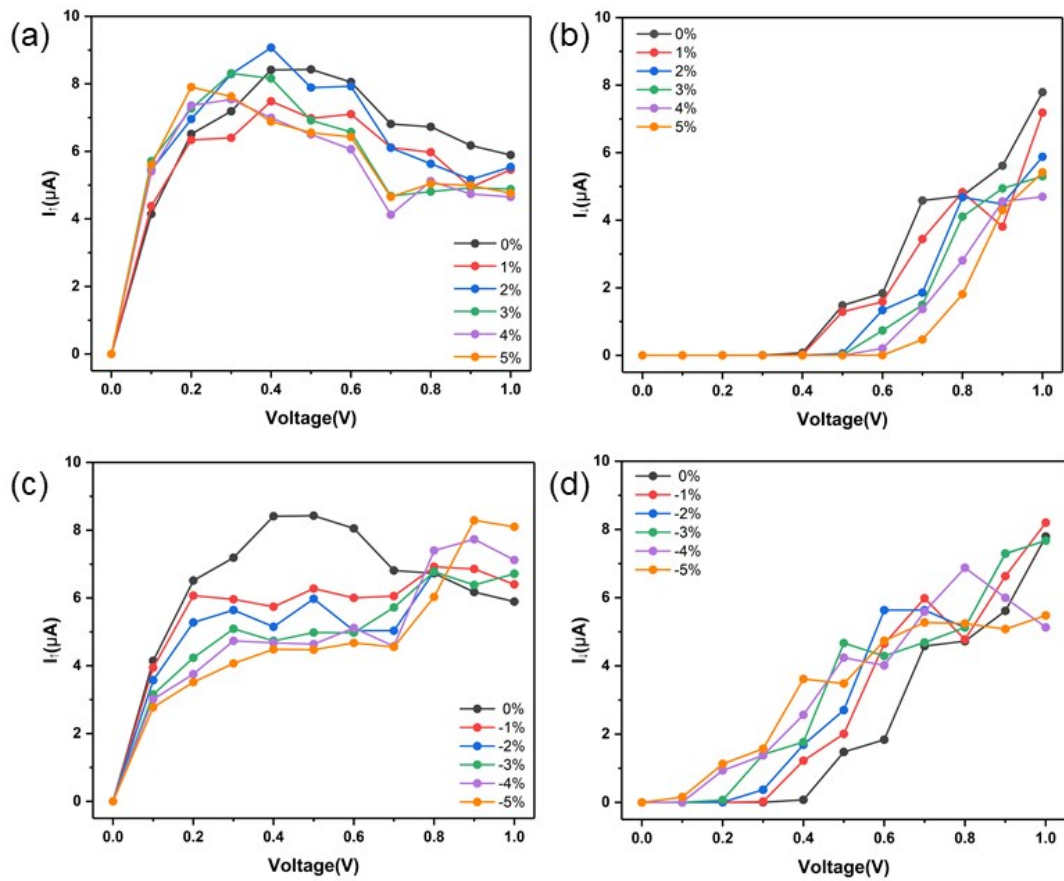

**Fig. S1** (a) Spin-up and (b) spin-down currents of  $\text{VBr}_3$  nanowires with tensile strains as a function of the applied bias. (c) Spin-up and (d) spin-down currents of  $\text{VBr}_3$  with compressive strains as a function of the applied bias.

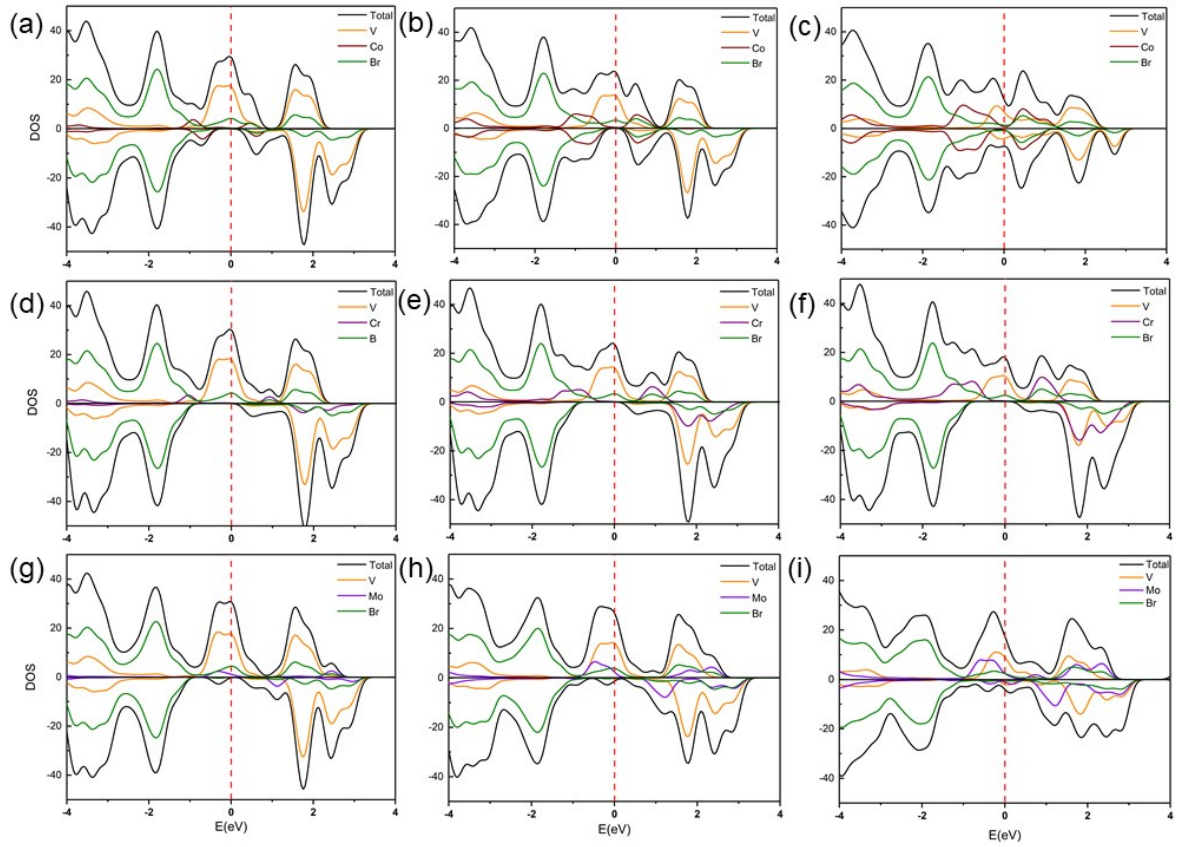

**Fig. S2** Partial density of states (PDOS) of  $VBr_3$  nanowires doped with (a) 1, (b) 3, and (c) 5 Co atoms. PDOS of  $VBr_3$  nanowires doped with (d) 1, (e) 3, and (f) 5 Cr atoms. PDOS of  $VBr_3$  nanowires doped with (g) 1, (h) 3, and (i) 5 Mo atoms.

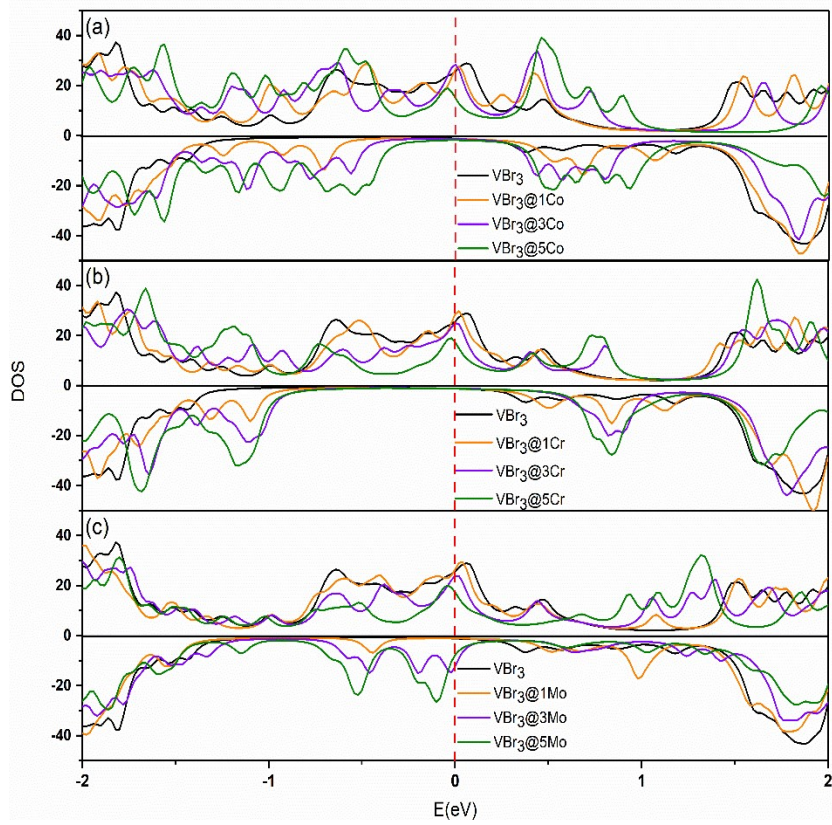

**Fig. S3** Partial density of states (PDOS) of  $VBr_3$  nanowires doped with (a) Co, (b) Cr, and (c) Mo in two-probe systems.

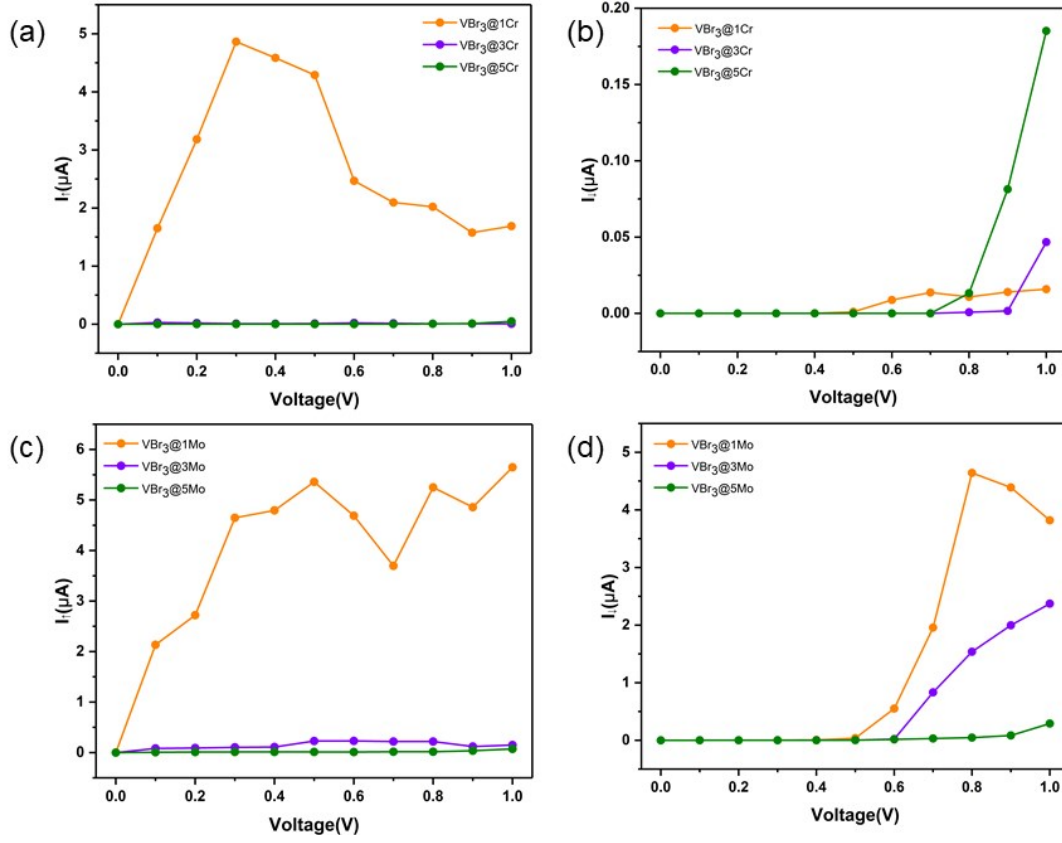

**Fig. S4** (a) Spin-up and (b) spin-down currents of Cr-doped  $\text{VBr}_3$  nanowires. (c) Spin-up and (d) spin-down currents of Mo-doped  $\text{VBr}_3$  nanowires.
